# Supplementary material
Source: publisher figshare collection journal article supplement (https://acs.figshare.com/ndownloader/files/10224993)
Supplement: Supplementary file 1 [file 10224993]

11
3-exo-trig
C         -1.36339       -1.36936        0.01827
C         -2.67341       -0.65371       -0.16714
C         -1.50761        1.60199       -0.12256
C         -1.96351        0.43726        0.51516
H         -0.64509       -1.29267       -0.80009
H         -3.00461       -0.41598       -1.19073
H         -1.35501       -2.30531        0.58594
H         -0.73396        2.21368        0.34977
H         -3.50954       -1.09299        0.38947
H         -1.49033        1.61025       -1.21787
H         -1.98937        0.39682        1.60394

9
3-exo-dig
C          1.31499       -0.64794       -0.10148
C          0.68016        0.73524       -0.08002
C         -1.71204       -0.33091       -0.73286
C         -0.58031        0.14681       -0.42452
H          1.66643       -1.01854        0.86494
H          0.68046        1.23641        0.90080
H          1.98632       -0.83954       -0.94236
H          1.05946        1.45884       -0.82032
H         -2.62568        0.24504       -0.88025

9
4-endo-dig
C         -2.39440       -0.76724        0.61472
C         -1.60875       -1.27023       -0.25812
C         -2.24811        0.72146        0.59285
H         -3.19115        1.27799        0.79190
H         -1.58893        0.99102        1.43273
C         -1.56648        1.01089       -0.76104
H         -1.16963        2.04373       -0.87764
H         -2.29323        0.85816       -1.57529
H         -1.15496       -2.05790       -0.83984

11
4-endo-trig
C          1.88310       -0.78494       -0.66130
C          1.75522       -1.06071        0.71674
H          0.93588       -0.83508       -1.21802
H          0.98855       -1.72932        1.12861
H          2.64104       -0.98860        1.35017
C          2.41132        0.63603       -0.53501
H          3.46918        0.62732       -0.20495
H          2.39900        1.24093       -1.46709
C          1.51993        1.10475        0.63151
H          0.45934        1.09037        0.32852
H          1.75006        2.10648        1.07769

12
4-exo-dig
C         -2.49832       -1.23271       -0.31758
C         -1.09438       -1.35270        0.23708
C         -2.85677        0.15929        0.17145
C         -0.82833        1.88808       -0.11373
C         -1.56226        0.88591        0.05016
H         -2.46897       -1.23058       -1.41863
H         -3.68493        0.67990       -0.34462
H         -3.25772       -1.98529       -0.02201
H         -0.42744       -2.06182       -0.28055
H         -3.13258        0.10501        1.23808
H         -1.09129       -1.56138        1.32069
H         -0.84299        2.95205       -0.30113

14
4-exo-trig
C         -2.53562       -1.36780        0.03129
C         -1.02944       -1.32327        0.16549
C         -2.74354        0.08691       -0.36307
C         -1.00860        1.90001        0.03544
C         -1.65107        0.73886        0.45401
H         -3.00668       -2.09794       -0.65508
H         -2.50431        0.21877       -1.43214
H         -2.98978       -1.53770        1.02267
H         -0.31476        2.42363        0.69666
H         -0.51558       -1.27103       -0.80863
H         -3.74786        0.52034       -0.20224
H         -0.56154       -2.08135        0.81529
H         -0.86292        2.07579       -1.03509
H         -1.79011        0.61046        1.53228

12
5-endo-dig
C         -1.86369       -1.23451        0.55655
C         -1.11561       -1.55691       -0.38896
C         -2.56679        0.00891        0.89651
H         -3.60595       -0.07356        0.53743
H         -2.63595        0.19691        1.97784
C         -1.86516        1.24168        0.19539
H         -0.97878        1.46544        0.81202
H         -2.58148        2.06865        0.37304
C         -1.45497        1.06450       -1.22624
H         -0.49645        1.52915       -1.48642
H         -2.22871        1.31948       -1.96720
H         -0.53760       -2.21459       -1.01005

14
5-endo-trig
C          1.61037       -1.22330       -0.45449
C          1.38752       -1.24486        0.90992
H          0.75178       -1.45024       -1.10030
H          0.54056       -1.77762        1.35000
H          2.21069       -1.06979        1.60022
C          2.41928       -0.04736       -0.86845
H          3.39280       -0.02889       -0.34700
H          2.62934        0.00570       -1.94828
C          1.63170        1.24883       -0.39907
H          0.73857        1.32383       -1.04380
H          2.27340        2.10669       -0.67230
C          1.22470        1.18592        1.03744
H          0.25156        1.63515        1.27390
H          1.99950        1.50267        1.75368

15
5-exo-dig
C          2.58303       -0.66488        0.80539
C          2.07710       -1.58976       -0.30100
C          2.73720        0.76009        0.28172
C          0.85477       -0.99953       -0.95991
C          0.67824        2.37022       -0.05495
C          1.47057        1.40898       -0.07554
H          1.86261       -0.66045        1.64007
H          3.23651        1.38828        1.03705
H          3.54448       -1.01004        1.21712
H          1.97236       -2.60752        0.14242
H          3.39898        0.73854       -0.59956
H          0.64135       -1.43597       -1.95036
H         -0.04653       -1.09003       -0.32659
H          2.88574       -1.68597       -1.04859
H         -0.28785        2.72310       -0.37098

17
5-exo-trig
C         -3.02030       -0.66624       -0.26786
C         -1.86967       -1.66106       -0.13427
C         -2.45101        0.70923       -0.57755
C         -0.93546       -1.14451        0.92862
C         -0.43447        2.08075        0.01612
C         -1.42266        1.20152        0.40360
H         -3.75408       -0.96321       -1.03582
H         -1.99555        0.69451       -1.58319
H         -3.56730       -0.62477        0.69057
H          0.21653        2.55914        0.74850
H         -1.34337       -1.69460       -1.10644
H         -3.27002        1.44712       -0.62841
H         -1.29333       -1.34425        1.95465
H          0.11696       -1.45220        0.82075
H         -2.29169       -2.68310       -0.00034
H         -0.08597        2.09554       -1.01994
H         -1.76435        1.24368        1.43827

15
6-endo-dig
C          1.06389        1.75748        0.13670
C          1.49434       -1.28614        1.02614
C          0.92603       -0.43635        1.72706
H          0.23993        1.99752       -0.56842
H          1.40640        2.71874        0.56991
C          2.10100       -1.47162       -0.30628
H          3.19165       -1.58354       -0.18941
H          1.76358       -2.41351       -0.76415
C          1.81221       -0.28311       -1.22880
H          0.73786       -0.27003       -1.47249
H          2.34484       -0.45865       -2.17648
C          2.20090        1.08080       -0.62678
H          2.62887        1.69152       -1.45387
H          3.05809        0.91355        0.05371
H          0.42995       -0.01862        2.57805

17
6-endo-trig
C          0.93282        1.50583        0.79000
C          1.04364       -1.46989        0.38551
C          1.14012       -0.76803        1.55658
H          0.06288       -1.83689        0.06564
H         -0.03965        1.32950        0.29782
H          0.36379       -0.81900        2.31788
H          0.92664        2.51697        1.24512
H          2.11327       -0.43266        1.91206
C          2.04585       -1.17479       -0.69283
H          3.07158       -1.28531       -0.28981
H          1.96630       -1.89123       -1.52635
C          1.93260        0.25400       -1.24304
H          0.95095        0.37389       -1.73384
H          2.69586        0.38435       -2.03157
C          2.09479        1.36130       -0.18970
H          2.33498        2.29672       -0.73725
H          3.03711        1.13075        0.36019

18
6-exo-dig
C          2.59141        0.08853        1.12401
C          2.94282       -1.16598        0.32346
C          2.34045        1.32149        0.25088
C          2.09235       -1.36414       -0.93476
C         -0.01642        2.35537       -0.28585
C          0.93720        1.57373       -0.11976
H          1.69860       -0.09016        1.73552
H          2.69272        2.22752        0.76953
H          3.41315        0.30842        1.82192
H          2.82458       -2.04205        0.98227
H          2.95373        1.25232       -0.66106
H          2.45375       -0.66259       -1.71016
H          2.36363       -2.37027       -1.33821
H          4.01154       -1.13738        0.04971
H         -1.04399        2.46275       -0.58381
C          0.63038       -1.09621       -0.66922
H          0.01184       -1.16831       -1.58185
H          0.22169       -1.79270        0.09093

20
6-exo-trig
C         -0.60723       -1.34200       -0.27179
C         -1.80062       -0.49441        0.16311
C          0.72842       -1.00487        0.39267
C         -1.80174        0.91352       -0.42613
C          2.64498        0.60973        0.39320
C          1.55829        0.07761       -0.23899
H         -0.83640       -2.39852       -0.06137
H          0.55675       -0.75377        1.45364
H         -0.49185       -1.26770       -1.36666
H          3.32904        1.28681       -0.11738
H         -1.79024       -0.42522        1.26599
H          1.34827       -1.92161        0.41259
H         -1.98129        0.81701       -1.51441
H         -2.71775        1.42690       -0.03967
H         -2.73704       -1.01621       -0.09656
H          2.74807        0.53976        1.47908
H          1.50344        0.12967       -1.32555
C         -0.47216        1.59248       -0.19812
H         -0.38141        2.57138       -0.70469
H         -0.23300        1.71186        0.87600

18
7-endo-dig
C          1.40949        1.88859       -0.29877
C          1.35574       -1.69595        0.84577
C          0.75819       -0.95666        1.64716
H          0.67488        2.03674       -1.11346
H          2.01179        2.82791       -0.29944
C          1.95262       -1.75950       -0.49796
H          3.03901       -1.92385       -0.41462
H          1.57210       -2.63587       -1.04427
C          1.68453       -0.47958       -1.30436
H          0.59576       -0.31889       -1.32260
H          1.99305       -0.65561       -2.34625
C          2.36827        0.77472       -0.74879
H          3.05890        1.17677       -1.50824
H          2.99868        0.50199        0.11406
H          0.27916       -0.71608        2.57368
C          0.68749        1.59816        1.00356
H          1.39336        1.64772        1.85493
H         -0.11199        2.34191        1.18933

20
7-endo-trig
C          1.38362       -0.65005       -0.43863
C         -0.94755        1.27362       -0.72915
C          0.03085        1.95277       -0.04677
H          0.90700       -0.32006       -1.38652
H          2.11465       -1.42495       -0.75411
C         -1.73950        0.18535       -0.06156
H         -1.82998        0.42761        1.01317
H         -2.77305        0.14295       -0.44769
C         -1.13567       -1.22201       -0.16965
H         -1.13245       -1.53228       -1.22835
H         -1.79933       -1.93325        0.35344
C          0.28168       -1.34563        0.38949
H          0.51380       -2.41739        0.49498
H          0.28802       -0.93651        1.41475
H         -0.01702        2.02327        1.03823
C          1.98857        0.55199        0.24443
H          2.20100        0.36493        1.31324
H          2.91133        0.90822       -0.25157
H         -0.93707        1.27321       -1.82455
H          0.61585        2.73335       -0.52686

18
Ni-3-exo-dig
C          1.76663        1.02642        0.08170
C          2.92693        0.17394        0.56733
C          0.91947       -1.61495        0.66113
C          1.87830       -0.79603        0.62179
H          1.87692        1.34550       -0.95551
H         -1.78863       -2.40755       -0.88263
H         -2.14339       -1.93979        1.19312
H         -0.48171        2.12988       -2.08778
P         -1.81080       -1.30000       -0.01495
H          3.70606       -0.02993       -0.16926
H         -3.05969       -0.74326       -0.35362
H          1.49200        1.81335        0.78460
H         -0.63756        2.96642       -0.10832
H          3.34912        0.45271        1.53448
H         -2.31302        1.89823       -0.96583
P         -0.92063        1.77041       -0.79790
H          0.66859       -2.63490        0.90956
Ni        -0.00286       -0.06519        0.00579

20
Ni-3-exo-trig
C          1.65561        1.08715       -0.32612
C          2.86055        0.21500       -0.13236
C          1.14436       -1.66050        0.07339
C          1.91227       -0.62913        0.63228
H          1.35191        1.21503       -1.37252
H         -3.04293       -0.92109       -0.31565
H         -1.68176       -2.25588       -1.32140
H         -2.53071        1.92143       -0.08287
P         -1.72383       -1.40497       -0.19943
H          3.23304       -0.25640       -1.04411
H         -1.90872       -2.36360        0.81577
H          1.64530        2.00449        0.26337
H         -0.70901        2.93927       -0.65175
H          0.71382       -2.40602        0.73960
H          3.67079        0.64492        0.45549
H          1.37724       -2.00309       -0.93740
H          1.84796       -0.44053        1.70469
H         -1.08393        2.46902        1.41654
P         -1.14138        1.86075        0.14676
Ni        -0.01072       -0.02869       -0.01535

18
Ni-4-endo-dig
C         -1.92092       -1.07499        0.44017
C         -1.53250       -0.67231       -0.80117
H          2.84969       -1.59567       -0.03728
H          1.17911       -2.78383       -0.75482
H          1.29564       -2.24146        1.33752
P          1.44667       -1.66909        0.06040
C         -2.31124        0.28216        0.99531
H         -3.39671        0.37266        1.13369
H         -1.83773        0.50971        1.95780
C         -1.76499        1.03267       -0.23800
H         -1.30076        2.02714       -0.20630
H         -2.55562        1.11011       -0.99748
H         -1.65776       -0.97358       -1.83939
P          1.53468        1.68130        0.10285
H          2.40330        1.60183        1.20710
H          2.47082        1.85791       -0.93259
H          1.06112        3.00064        0.24600
Ni         0.05951        0.03479       -0.21152

20
Ni-4-endo-trig
C         -1.73967        0.47586        0.54300
C         -1.38911       -0.78703        1.17368
H          0.55639        2.83579        1.00656
H          2.09237        2.32864       -0.42322
H          3.16363       -0.67846       -0.56686
P          0.75501        2.00706       -0.11481
Ni         0.08044       -0.05564        0.06643
H          0.09176        2.77546       -1.09237
H          1.99004       -2.45727       -0.80853
H         -1.90323        1.43126        1.04090
H         -0.67770       -0.82469        2.01455
H          2.48867       -1.75768        1.15605
P          1.98264       -1.26061       -0.06206
H         -2.12973       -1.58083        1.27809
C         -2.41661       -0.05560       -0.70012
H         -3.46104       -0.35911       -0.54617
H         -2.36244        0.59445       -1.57983
C         -1.41743       -1.21659       -0.74297
H         -0.62082       -1.10066       -1.50281
H         -1.74973       -2.25291       -0.72748

21
Ni-4-exo-dig
C         -2.92341        0.65311        0.53676
C         -1.49203        1.02277        0.14715
C         -3.04100       -0.54121       -0.40014
C         -0.66108       -1.69923       -0.03904
C         -1.59548       -0.85375       -0.28153
H         -2.96819        0.32875        1.58181
H          2.22757       -2.00053        1.20909
H          2.18114       -2.42422       -0.91432
H          2.51578        2.13969        0.06204
P          2.08351       -1.34098       -0.02390
H         -3.70306       -1.36549       -0.11819
H          3.36584       -0.77348       -0.16408
H         -3.63979        1.46782        0.38673
H          0.70319        2.99098       -0.75383
H         -0.91640        1.49667        0.95128
H         -3.28354       -0.21958       -1.42117
H         -1.48624        1.63325       -0.76110
H          2.00771        1.78898       -1.99428
P          1.40509        1.76737       -0.72122
H         -0.48631       -2.76342        0.03926
Ni         0.30944       -0.10965       -0.19212

23
Ni-4-exo-trig
C          3.01246        0.82561       -0.23515
C          1.50289        1.05935       -0.12356
C          2.88830       -0.68127       -0.31612
C          0.61042       -1.69241        0.35972
C          1.65003       -0.71410        0.55662
H          3.49050        1.34720       -1.07068
H         -1.95172       -2.36188       -1.15219
H         -2.41153       -2.11281        0.94408
H         -1.44858        2.59681        1.28226
P         -2.06460       -1.34710       -0.18423
Ni        -0.34912       -0.05438        0.03481
H          2.63283       -1.00348       -1.33466
H         -3.32328       -0.81278       -0.52534
H          3.51070        1.12632        0.69396
H         -2.83693        1.99010       -0.24345
H          0.20144       -2.18834        1.24262
H          1.08116        1.16451       -1.13667
H          3.71668       -1.29797        0.05004
H          1.22260        1.89883        0.51950
H          0.71068       -2.34114       -0.51462
H          1.86281       -0.45902        1.59901
H         -0.97668        2.94058       -0.78557
P         -1.46086        1.91135        0.04998

21
Ni-5-endo-dig
C         -1.76378        1.29497       -0.05533
C         -1.28062        0.66196        1.01879
C         -2.44516        0.45137       -1.06397
C         -2.01636       -1.02555       -0.84072
C         -1.42589       -1.12662        0.55490
H         -3.52065        0.58633       -0.85626
H         -2.29921        0.79478       -2.09335
H         -1.27183       -1.30483       -1.59707
H         -2.86460       -1.70796       -0.96700
H         -0.87822       -2.05097        0.78073
H         -2.20693       -1.10834        1.33027
H         -1.30524        0.87535        2.08496
Ni         0.29482       -0.01875        0.33541
P          1.74534       -1.63035       -0.17863
H          2.78377       -1.36987       -1.09235
H          1.21864       -2.81772       -0.72834
H          2.49066       -2.16160        0.89090
P          1.57170        1.73708       -0.03071
H          2.97165        1.69725       -0.18416
H          1.43434        2.78161        0.90179
H          1.19146        2.39939       -1.21379

23
Ni-5-endo-trig
C         -1.41039        0.79089        0.73350
C         -1.15009       -0.46314        1.38173
H          1.20140        2.80151        0.90424
H          2.47160        2.11679       -0.69766
H          1.88543       -2.73436       -0.47740
P          1.15820        1.94598       -0.21448
Ni         0.26429       -0.03415        0.06840
H          0.46281        2.78071       -1.11339
H          2.74145       -1.61922        1.14640
H         -1.25479        1.73352        1.25854
H         -0.39597       -0.49144        2.17957
H          3.16175       -1.05412       -0.87540
P          2.05863       -1.39534       -0.06618
H         -1.92509       -1.20643        1.56281
C         -2.44041        0.70088       -0.36396
H         -3.41648        1.08638       -0.03915
H         -2.13521        1.31415       -1.22332
C         -2.51108       -0.78821       -0.73679
H         -2.77769       -0.93066       -1.79020
H         -3.28050       -1.29417       -0.14203
C         -1.14108       -1.38816       -0.45788
H         -0.47346       -1.22372       -1.33203
H         -1.10064       -2.44034       -0.17077

24
Ni-5-exo-dig-SP-onM062X
C         -3.49046        0.02377       -0.18613
C         -2.63771        0.55532        0.96766
C         -2.56634       -0.77406       -1.12744
C         -1.25981        0.96053        0.46902
C         -0.37684       -1.81845       -0.00041
C         -1.28838       -1.08257       -0.45068
H         -4.30148       -0.60555        0.18735
H          2.59183       -2.11610        1.46369
H          2.82913       -2.09868       -0.66827
H          0.84581        3.15084       -0.44886
P          2.50937       -1.22628        0.38296
Ni         0.49482       -0.06749        0.17017
H         -3.00540       -1.72871       -1.43073
H          3.73889       -0.56398        0.52481
H         -3.94361        0.85133       -0.73835
H          2.52585        2.06801       -1.24831
H         -2.53851       -0.20530        1.75009
H         -2.34576       -0.21090       -2.03888
H         -1.33016        1.69135       -0.34214
H         -0.69876        1.39140        1.31065
H         -3.11967        1.42529        1.42878
H          2.42460        2.48748        0.84361
P          1.60652        1.99981       -0.18890
H         -0.00887       -2.82197        0.12523

26
Ni-5-exo-trig
C         -3.48531        0.30436        0.05646
C         -2.51624        1.00966        0.97377
C         -2.75878       -0.97755       -0.27825
C         -1.16094        1.13954        0.31392
C         -0.36191       -1.68906       -0.52883
C         -1.36325       -0.70278       -0.77946
H         -4.45717        0.11648        0.52508
H          2.02731       -2.35429        1.37502
H          2.69874       -2.17226       -0.66653
H          2.55378        1.82942       -1.49313
P          2.24121       -1.36776        0.39427
Ni         0.53634       -0.05511        0.01058
H         -2.70422       -1.61861        0.61365
H          3.46612       -0.83643        0.84750
H         -3.65978        0.89961       -0.85196
H          2.85282        2.11421        0.60422
H          0.22197       -2.06286       -1.37246
H         -2.42145        0.44636        1.91369
H         -3.26015       -1.56080       -1.06241
H         -1.17704        1.86177       -0.51046
H         -0.45981        1.48357        1.09001
H         -2.85110        2.02139        1.24423
H         -0.57574       -2.43362        0.24139
H         -1.33424       -0.22761       -1.76365
H          1.19563        3.07952       -0.37511
P          1.80965        1.80998       -0.29603

24
Ni-6-endo-dig
C          0.75386       -1.15352        1.02513
C          1.12531       -0.20320       -1.19232
C          0.49005       -1.33713       -1.15071
H         -1.62189        2.88537       -0.56816
H         -1.17127        2.53010        1.48877
H         -2.52404       -2.16114        0.86992
P         -0.71580        2.13836        0.21239
Ni        -0.49563       -0.04751       -0.29213
H          0.39917        2.99924        0.11606
H         -3.32472       -1.28527       -0.91070
H          0.18719       -0.50365        1.70912
H         -3.49034       -0.25566        0.95463
P         -2.51561       -0.92604        0.18616
H          0.42134       -2.18977        1.10365
C          2.42900        0.44215       -1.03667
H          3.19841       -0.11443       -1.58781
H          2.43860        1.48379       -1.37435
C          2.71562        0.37220        0.49177
H          2.20072        1.20171        0.99510
H          3.78891        0.51261        0.65800
C          2.24686       -0.95234        1.07322
H          2.52991       -1.00116        2.13640
H          2.75804       -1.78466        0.57184
H          0.45133       -2.38427       -1.42088

26
Ni-6-endo-trig
C         -0.76682       -1.60882       -0.31421
C         -1.14144        0.75245        1.05598
C         -0.86167       -0.56130        1.54203
H          1.32980        2.86443        0.77504
H          2.35055        2.22637       -1.01421
H          2.30981       -2.59674       -0.40349
P          1.14876        1.99100       -0.31580
Ni         0.42624       -0.04401        0.11783
H          0.26679        2.77331       -1.08973
H          3.17430       -1.24865        1.03303
H         -0.77652        1.59322        1.64913
H         -0.14882       -1.46654       -1.22477
H         -0.07197       -0.67860        2.29173
H          3.33229       -0.82324       -1.05831
P          2.35847       -1.21523       -0.11597
H         -0.55273       -2.59425        0.10661
H         -1.64504       -1.30307        1.67002
C         -2.38046        1.00248        0.23422
H         -3.26067        0.83589        0.87710
H         -2.41597        2.05655       -0.06824
C         -2.48636        0.10620       -1.00007
H         -1.76501        0.44963       -1.75929
H         -3.48191        0.21693       -1.44583
C         -2.21372       -1.36175       -0.69066
H         -2.41553       -1.96710       -1.58689
H         -2.90811       -1.72366        0.08106

27
Ni-6-exo-dig
C          2.93554        0.38458       -0.93759
C          3.41289        0.36788        0.50966
C          2.14795       -0.86934       -1.27376
C          2.31918       -0.12980        1.45873
C         -0.08330       -1.84334       -0.23063
C          0.88246       -1.05390       -0.51119
H          2.29510        1.26008       -1.11955
H         -3.92914       -0.07833        0.12148
H         -3.15331       -1.75907       -0.98658
P         -2.80184       -0.92457        0.09072
H          1.87191       -0.87181       -2.33616
H         -3.10914       -1.77292        1.17018
H          3.78460        0.47605       -1.62368
H          3.72558        1.37882        0.80297
H          2.76676       -1.76428       -1.11205
H          2.31410       -1.22418        1.52943
H          2.52766        0.23270        2.47634
H          4.29751       -0.27490        0.60689
H         -0.49276       -2.83998       -0.30160
C          0.95081        0.41008        1.09325
H          0.22669        0.20306        1.90227
H          1.02970        1.48158        0.89003
P         -1.33987        2.01840       -0.28434
H         -0.34933        3.02192       -0.34048
H         -1.98639        2.24415       -1.51552
H         -2.26606        2.64734        0.57247
Ni        -0.74354       -0.10529        0.08247

29
Ni-6-exo-trig
C          3.37766       -0.72151       -0.58011
C          3.41704        0.75199       -0.21232
C          1.96466       -1.22178       -0.83545
C          2.48264        1.10095        0.93838
C         -0.14441       -1.86065        0.39459
C          1.06083       -1.11912        0.37848
H          3.99834       -0.90895       -1.46551
H         -3.06353       -2.00194        0.73452
H         -3.84781       -0.35386       -0.41804
P         -2.64685       -1.07315       -0.23651
H          1.51259       -0.68942       -1.68569
H         -2.67230       -1.87777       -1.39075
H          3.81783       -1.31334        0.23778
H         -0.51571       -2.22846        1.35229
H          3.13700        1.35919       -1.08845
H          1.99660       -2.28118       -1.12764
H          2.71433        0.48829        1.82231
H          2.67930        2.13939        1.24705
H          4.44345        1.04102        0.04816
H         -0.36448       -2.49925       -0.46493
H          1.55905       -1.05581        1.34389
C          1.00122        1.07143        0.58034
H          0.43533        1.52195        1.40825
H          0.89094        1.67598       -0.32898
P         -1.76908        1.95031       -0.28064
H         -2.88287        2.27193        0.52194
H         -1.02552        3.14623       -0.17524
H         -2.35956        2.12722       -1.54861
Ni        -0.75366       -0.02262        0.12893

27
Ni-7-endo-dig
C          1.46640       -0.90045        1.53853
C          0.92739       -0.15725       -1.30501
C          0.31274       -1.29221       -1.31474
H          0.02981        3.04148       -0.36916
H         -0.17382        2.37604        1.65319
H          1.15002        0.03340        2.02265
H         -1.91874        2.75528        0.47541
P         -0.68575        2.07811        0.37192
H          1.67463       -1.59539        2.37095
C          2.18477        0.59104       -1.41797
H          2.84201        0.06470       -2.12442
H          2.02811        1.60559       -1.80296
C          2.84398        0.64204       -0.02736
H          2.39089        1.44910        0.56708
H          3.89262        0.92620       -0.17362
C          2.77481       -0.66356        0.77325
H          3.57920       -0.63677        1.51788
H          2.99649       -1.52308        0.12236
H          0.20142       -2.28555       -1.72509
C          0.29953       -1.54699        0.83502
H          0.52647       -2.54981        0.47054
H         -0.60837       -1.58469        1.44600
P         -2.81618       -0.66783        0.04377
H         -3.68296        0.11993        0.83106
H         -3.58974       -0.71728       -1.13375
H         -3.13861       -1.93637        0.57175
Ni        -0.63889       -0.08074       -0.28151

29
Ni-7-endo-trig
C         -1.12748       -1.85699       -0.73923
C         -0.98394        1.13395        0.95383
C         -1.03513       -0.05165        1.73550
H          2.43323        1.84348       -1.30447
H          0.42747        2.63477       -1.25676
P          1.29351        1.84783       -0.47208
H          1.69616        2.80100        0.48299
H         -0.54691        2.01504        1.43120
H         -0.37755       -1.58357       -1.50054
H         -0.47301       -0.10393        2.66860
H         -1.35556       -2.91762       -0.93534
H         -2.00128       -0.54234        1.79379
C         -2.09175        1.40352       -0.04192
H         -3.04893        1.38170        0.50591
H         -1.99263        2.42951       -0.42024
C         -2.19668        0.46336       -1.24655
H         -1.31191        0.58887       -1.89154
H         -3.04590        0.81955       -1.84497
C         -2.39629       -1.03516       -0.98327
H         -2.87981       -1.45788       -1.87331
H         -3.11419       -1.18907       -0.16240
C         -0.53034       -1.81495        0.65815
H         -1.22739       -2.22706        1.38563
H          0.36599       -2.42945        0.76100
P          2.43750       -1.10638       -0.06906
H          3.60534       -0.53966        0.48195
H          2.63064       -2.45836        0.28941
H          2.84839       -1.16361       -1.41793
Ni         0.50494       -0.02455        0.35222

18
Pd-3-exo-dig
C         -1.97075        0.93315       -0.04709
C         -3.19828        0.04108       -0.09625
C         -1.15707       -1.71687       -0.05623
C         -2.12823       -0.89909       -0.07488
H         -1.85920        1.47508        0.89012
H          3.12796       -0.93524       -0.72102
H          2.66375       -1.51560        1.30220
H          0.35688        3.16777       -0.27570
P          2.03199       -1.35742        0.05484
H         -3.82848        0.05808        0.79375
H          1.94867       -2.70282       -0.34851
H         -1.79784        1.49210       -0.96478
H          2.26258        2.28667       -0.76080
H         -3.77242        0.08143       -1.02267
H          1.67182        2.50455        1.29218
P          1.14726        2.05035        0.06657
H         -0.96206       -2.77867       -0.06898
Pd         0.07260       -0.07993        0.00725

20
Pd-3-exo-trig
C          1.82124        0.96278       -0.34528
C          2.98587        0.02652       -0.27380
C          1.13918       -1.72243        0.07873
C          2.01499       -0.71632        0.55284
H          1.44544        1.14456       -1.35619
H         -3.35367       -0.86257       -0.04645
H         -2.18072       -2.29183       -1.14204
H         -2.48558        2.25661       -0.60470
P         -2.06171       -1.42472       -0.03856
H          3.24066       -0.45680       -1.21779
H         -2.22148       -2.35899        1.00318
H          1.85723        1.82774        0.31340
H         -0.56810        3.20718       -0.39412
H          0.74286       -2.42875        0.80649
H          3.86043        0.39506        0.25897
H          1.29274       -2.11600       -0.92798
H          2.03757       -0.51174        1.62273
H         -1.65140        2.55908        1.34318
P         -1.26565        2.07450        0.07752
Pd        -0.15210       -0.04035        0.00124

18
Pd-4-endo-dig
C          2.18454        0.91468        0.67570
C          1.73301        0.77393       -0.59453
H         -2.86297        1.63186        0.79188
H         -2.10467        2.50189       -1.02757
H         -1.14708        2.94179        0.85965
P         -1.63925        1.84492        0.12704
C          2.65962       -0.50188        0.92869
H          3.75271       -0.57080        0.87311
H          2.34067       -0.90894        1.89343
C          1.94516       -1.03469       -0.31979
H          1.35777       -1.95995       -0.31390
H          2.61836       -1.08445       -1.18361
H          1.92361        1.21861       -1.56929
P         -1.74150       -1.68104        0.03460
H         -2.64582       -1.61892        1.11268
H         -2.65442       -1.83361       -1.02617
H         -1.30326       -3.01439        0.16493
Pd        -0.09463        0.05997       -0.17363

20
Pd-4-endo-trig
C         -1.92042        0.64243        0.42823
C         -1.81293       -0.58228        1.18779
H          0.54250        3.14100        0.60119
H          2.44609        2.17000        0.34783
H          3.27461       -0.93923       -0.39638
P          1.10799        2.04193       -0.07533
H          1.22502        2.60293       -1.36219
H          2.02718       -2.56637       -0.99940
H         -1.93917        1.65386        0.83102
H         -1.20208       -0.63439        2.09799
H          2.39761       -2.21432        1.07429
P          2.01826       -1.49744       -0.07914
H         -2.66242       -1.26035        1.25929
C         -2.56998        0.11877       -0.83084
H         -3.65839        0.00077       -0.74616
H         -2.34572        0.68511       -1.74025
C         -1.78540       -1.19379       -0.73036
H         -0.96991       -1.31816       -1.45893
H         -2.30099       -2.14265       -0.60131
Pd         0.05578       -0.05557        0.07427

21
Pd-4-exo-dig
C         -3.17022        0.67248        0.54998
C         -1.74780        1.04819        0.14869
C         -3.28363       -0.58407       -0.29770
C         -0.87305       -1.72861       -0.04884
C         -1.84230       -0.90972       -0.19473
H         -3.21060        0.42068        1.61503
H          3.18909       -1.11092        0.98390
H          2.10645       -2.76203        0.09902
H          2.39907        2.36726        0.85615
P          2.24136       -1.36784       -0.02340
H         -3.94252       -1.38772        0.04715
H          3.05754       -1.28851       -1.16613
H         -3.89864        1.46646        0.35056
H          0.66430        3.18407       -0.12360
H         -1.21981        1.62522        0.91366
H         -3.53945       -0.34013       -1.33729
H         -1.71109        1.54628       -0.82515
H          2.24988        2.29905       -1.28347
P          1.46873        2.02437       -0.14445
H         -0.63580       -2.78214       -0.02589
Pd         0.30740       -0.08535       -0.01858

23
Pd-4-exo-trig
C          3.20776        0.83505       -0.12460
C          1.71069        1.10519        0.04274
C          3.05509       -0.64223       -0.42233
C          0.80355       -1.75103        0.23187
C          1.85585       -0.80454        0.48421
H          3.68919        1.45770       -0.88588
H         -3.49230       -0.82292       -0.27587
H         -2.22556       -2.24138       -1.29817
H         -2.23257        2.45890        1.18386
P         -2.21041       -1.39547       -0.17388
H          2.75805       -0.80721       -1.46685
H         -2.43397       -2.33773        0.84683
H          3.72882        0.98601        0.82817
H         -2.54246        2.29052       -0.92635
H          0.40775       -2.31395        1.07885
H          1.28860        1.39421       -0.92962
H          3.89145       -1.31034       -0.18567
H          1.43748        1.81350        0.82871
H          0.84282       -2.30511       -0.70933
H          2.09463       -0.64985        1.54005
H         -0.77355        3.25915       -0.17949
P         -1.52442        2.08077        0.02572
Pd        -0.34719       -0.03434        0.04656

21
Pd-5-endo-dig
C          2.03571       -1.24558       -0.07354
C          1.42803       -0.77075        1.01573
C          2.79850       -0.27797       -0.88781
C          2.28297        1.14641       -0.54244
C          1.53198        1.07102        0.77323
H          3.84626       -0.40668       -0.56467
H          2.78937       -0.49599       -1.96027
H          1.61310        1.48711       -1.34112
H          3.10628        1.86836       -0.48845
H          0.88997        1.93687        0.98992
H          2.19185        1.02036        1.65138
H          1.41577       -1.10625        2.04990
P         -1.92793        1.62206       -0.20421
H         -2.86635        1.41784       -1.23413
H         -1.41567        2.87866       -0.58632
H         -2.79442        2.01979        0.83122
P         -1.72260       -1.90542       -0.29742
H         -2.95018       -1.72165       -0.96327
H         -2.13340       -2.74660        0.75322
H         -1.10745       -2.84377       -1.14825
Pd        -0.33333       -0.08981        0.28307

23
Pd-5-endo-trig
C         -1.55412        0.77763        0.76621
C         -1.36875       -0.45016        1.47496
H          1.14584        3.07162        0.97424
H          2.75234        2.25560       -0.19576
H          2.14744       -2.64816       -0.88920
P          1.35435        2.13797       -0.06087
H          0.95477        2.92974       -1.15602
H          3.02517       -1.77621        0.85838
H         -1.39433        1.73572        1.25916
H         -0.67772       -0.46892        2.32336
H          3.35490       -0.89002       -1.05580
P          2.28753       -1.38412       -0.27730
H         -2.18528       -1.15446        1.62011
C         -2.50422        0.66142       -0.39649
H         -3.48863        1.08635       -0.15566
H         -2.12282        1.23085       -1.25427
C         -2.59602       -0.84039       -0.71799
H         -2.80305       -1.00673       -1.78106
H         -3.42389       -1.28987       -0.15647
C         -1.28502       -1.50767       -0.32589
H         -0.58218       -1.53288       -1.17527
H         -1.33619       -2.50441        0.11210
Pd         0.33323        0.01150        0.11077

24
Pd-5-exo-dig
C         -3.70296        0.16959        0.01137
C         -2.73506        0.82173        0.98815
C         -2.88734       -0.80603       -0.84967
C         -1.40316        1.08321        0.32330
C         -0.62038       -1.76448        0.14944
C         -1.54556       -1.00116       -0.26778
H         -4.50880       -0.34804        0.54121
H          3.57705       -1.04977       -0.65256
H          3.19348       -1.23415        1.45790
H          2.25221        2.03088       -1.81839
P          2.51306       -1.32013        0.22893
H         -3.35348       -1.79527       -0.92407
H          2.43225       -2.71858        0.09118
H         -4.17085        0.92697       -0.62775
H          2.71388        2.44947        0.23264
H         -2.59232        0.19333        1.87752
H         -2.77130       -0.43300       -1.87531
H         -1.49974        1.64864       -0.61002
H         -0.74852        1.60238        1.03510
H         -3.12285        1.78568        1.34786
H          0.85615        3.14146       -0.60534
P          1.64405        1.97156       -0.54940
H         -0.33331       -2.78481        0.35218
P         0.52135       -0.07945        0.02990

26
Pd-5-exo-trig
C         -3.40383        0.24905        0.55224
C         -2.43232        1.34279        0.13443
C         -2.58205       -1.01723        0.73617
C         -1.55764        0.80297       -0.96676
C         -0.46686       -1.97421       -0.28868
C         -1.67837       -1.23444       -0.44723
H         -3.95931        0.50566        1.46057
H          3.49735       -1.05588       -0.62407
H          3.15213       -0.80513        1.48649
H          2.55646        2.52746       -0.42005
P          2.46146       -1.18596        0.32012
H         -1.96973       -0.95078        1.64788
H          2.45189       -2.58418        0.48735
H         -4.14319        0.09473       -0.24798
H          1.70098        2.44365        1.53704
H         -0.09782       -2.55269       -1.13667
H         -1.82303        1.66070        0.99372
H         -3.22687       -1.90044        0.84174
H         -2.12208        0.51550       -1.85401
H         -0.80357        1.50590       -1.33207
H         -2.97019        2.23237       -0.22412
H         -0.28283       -2.42726        0.68921
H         -2.18704       -1.39813       -1.39604
H          0.56098        3.24719       -0.09757
P          1.36047        2.12227        0.20741
Pd         0.45362       -0.11255       -0.19830

24
Pd-6-endo-dig
C          0.77834       -1.36386        1.02443
C          1.25225       -0.26331       -1.17849
C          0.58411       -1.36951       -1.22185
H         -1.70272        3.21763       -0.30179
H         -1.14448        2.67893        1.67986
H         -3.00236       -1.99484        0.77482
P         -0.78606        2.36646        0.35098
H          0.35160        3.19874        0.25750
H         -3.69175       -1.09158       -1.02595
H          0.17901       -0.75683        1.71068
H         -3.81263       -0.02868        0.81340
P         -2.86892       -0.77542        0.07551
H          0.41700       -2.38765        0.94765
C          2.54446        0.35503       -0.89238
H          3.34428       -0.19191       -1.40943
H          2.59122        1.40980       -1.18187
C          2.72526        0.21424        0.64583
H          2.14505        0.99882        1.15021
H          3.77934        0.37251        0.89575
C          2.25670       -1.15607        1.10834
H          2.50016       -1.27980        2.17703
H          2.78933       -1.94585        0.56392
H          0.52062       -2.39555       -1.55515
Pd        -0.61522        0.04281       -0.36394

26
Pd-6-endo-trig
C         -1.16795       -1.68061       -0.01446
C         -1.36013        0.97183        0.89509
C         -1.34650       -0.26857        1.59554
H          1.60116        2.93430        0.78400
H          2.79885        2.03193       -0.75801
H          2.10176       -2.87884       -0.48015
P          1.48050        1.99671       -0.26099
H          0.85012        2.81325       -1.22217
H          3.18910       -1.68176        0.92779
H         -0.95576        1.84399        1.41122
H         -0.44380       -1.91270       -0.80840
H         -0.68844       -0.36888        2.46122
H          3.24646       -1.19833       -1.15191
P          2.30115       -1.51928       -0.15493
H         -1.20048       -2.52414        0.67641
H         -2.25139       -0.85971        1.69821
C         -2.41622        1.21576       -0.14854
H         -3.39229        1.27525        0.36161
H         -2.25298        2.19289       -0.61968
C         -2.48186        0.12720       -1.22497
H         -1.62259        0.23693       -1.90623
H         -3.38102        0.28132       -1.83315
C         -2.48643       -1.28931       -0.65431
H         -2.67271       -2.00406       -1.46920
H         -3.32391       -1.40355        0.04918
Pd         0.38430       -0.05437        0.18552

27
Pd-6-exo-dig
C         -3.29751        0.10122        1.05025
C         -3.72740        0.56217       -0.33593
C         -2.51425       -1.19598        0.98591
C         -2.60081        0.40200       -1.35707
C         -0.25794       -1.87360       -0.18702
C         -1.23758       -1.16618        0.21796
H         -2.67403        0.86608        1.53334
H          3.46471       -1.28616       -1.31611
H          3.89694       -0.52332        0.64869
P          2.83904       -1.11741       -0.06663
H         -2.25584       -1.53290        1.99786
H          2.92205       -2.43356        0.42551
H         -4.16877       -0.03820        1.69932
H         -4.03906        1.61408       -0.29083
H         -3.13129       -1.99124        0.54149
H         -2.58613       -0.60725       -1.78760
H         -2.77969        1.07798       -2.20653
H         -4.60341       -0.00986       -0.66893
H          0.12827       -2.86847       -0.34650
C         -1.24006        0.77989       -0.80160
H         -0.54453        0.94490       -1.63904
H         -1.30693        1.66251       -0.16004
P          1.55069        2.11486        0.44780
H          0.77550        3.22428        0.04729
H          1.72180        2.42953        1.81042
H          2.80985        2.52807       -0.03133
Pd         0.71562       -0.08473       -0.08125

29
Pd-6-exo-trig
C         -3.65201       -0.68006        0.60958
C         -3.63302        0.81541        0.34681
C         -2.25949       -1.25989        0.79619
C         -2.72620        1.19666       -0.81420
C         -0.18115       -1.90116       -0.47981
C         -1.37123       -1.13169       -0.42386
H         -4.25894       -0.90191        1.49639
H          3.21011       -1.41108        1.44737
H          2.80636       -2.55046       -0.33830
P          2.73947       -1.22561        0.13359
H         -1.76452       -0.80807        1.66822
H          3.89846       -0.69266       -0.46307
H         -4.13863       -1.19274       -0.23491
H          0.17271       -2.25122       -1.45073
H         -3.29322        1.34703        1.25032
H         -2.33828       -2.33363        1.02008
H         -3.00735        0.64328       -1.72225
H         -2.89286        2.25762       -1.05992
H         -4.65227        1.16883        0.14504
H          0.04319       -2.56114        0.36194
H         -1.86975       -0.99672       -1.38225
C         -1.23724        1.10734       -0.52173
H         -0.68215        1.55896       -1.35244
H         -1.05183        1.64249        0.41764
P          1.77143        2.08949        0.30376
H          2.97686        2.41401       -0.35161
H          1.01496        3.24144       -0.00829
H          2.15008        2.41131        1.62274
Pd         0.72384       -0.05885       -0.13123

27
Pd-7-endo-dig
C          1.53563       -1.39983        1.28512
C          1.26259        0.26149       -1.23345
C          0.83010       -0.89075       -1.59401
H         -1.67958        2.32153        1.81174
H         -1.81330        3.06847       -0.18478
H          1.01245       -0.73727        1.98876
H          0.05931        3.10799        0.84195
P         -0.99814        2.21086        0.58167
H          1.76607       -2.31114        1.86444
C          2.39832        1.11661       -0.88069
H          3.22281        0.90289       -1.57584
H          2.16492        2.18427       -0.95603
C          2.81367        0.75218        0.55806
H          2.12329        1.23818        1.26225
H          3.80207        1.19329        0.73424
C          2.86344       -0.75130        0.86595
H          3.55639       -0.88850        1.70462
H          3.30628       -1.29908        0.02022
H          0.85938       -1.68248       -2.32651
C          0.58224       -1.90177        0.22730
H          1.01975       -2.66619       -0.41441
H         -0.35858       -2.28677        0.63081
P         -2.83978       -0.85298        0.06068
H         -3.65693       -0.27405        1.05516
H         -3.73674       -0.75851       -1.02321
H         -3.04652       -2.21023        0.39039
Pd        -0.57408       -0.01782       -0.30579

29
Pd-7-endo-trig
C         -1.61521       -1.83498       -0.66408
C         -1.11525        1.19701        1.04027
C         -1.33025       -0.00815        1.75483
H          0.91710        2.58242       -1.54461
H          1.55241        3.09140        0.44573
P          1.52330        1.98205       -0.42232
H          2.86457        1.97910       -0.85354
H         -0.61310        2.00395        1.57822
H         -0.88871       -1.76472       -1.48882
H         -0.83886       -0.15673        2.71525
H         -2.06140       -2.83957       -0.75015
H         -2.32570       -0.43487        1.70067
C         -2.09953        1.59973       -0.03149
H         -3.08129        1.74372        0.45099
H         -1.81668        2.58351       -0.42936
C         -2.26189        0.63535       -1.21152
H         -1.31709        0.59849       -1.77891
H         -2.99357        1.09578       -1.88855
C         -2.72052       -0.80345       -0.92190
H         -3.26189       -1.15629       -1.80917
H         -3.46633       -0.81521       -0.11254
C         -0.88218       -1.81121        0.66490
H         -1.48259       -2.18740        1.49122
H          0.01221       -2.43785        0.66598
P          2.31221       -1.44227       -0.37338
H          2.01210       -2.77357       -0.73962
H          3.10488       -1.07701       -1.48079
H          3.34401       -1.69285        0.55402
Pd         0.49196       -0.00052        0.32343

18
Pt-3-exo-dig-SP-onM062X
C         -2.01469        0.95626       -0.01964
C         -3.26794        0.06761       -0.00856
C         -1.19743       -1.67206        0.04276
C         -2.17880       -0.85043        0.01881
H         -1.90238        1.53170        0.89298
H          1.85460       -2.66746       -0.14810
H          2.95537       -0.95938       -0.89428
H          1.98012        2.28058       -1.10336
P          1.97355       -1.28647        0.04938
H         -3.86707        0.12273        0.89739
H          2.71888       -1.24389        1.23569
H         -1.89097        1.49160       -0.95490
H          1.93047        2.36262        1.04490
H         -3.85443        0.08316       -0.92431
H          0.26401        3.11812       -0.09819
P          1.11418        2.00146       -0.03681
H         -1.09620       -2.74653        0.06473
Pt         0.07359       -0.08147        0.01376

20
Pt-3-exo-trig-SP-onM062X
C         -1.91377        1.06417        0.24565
C         -3.13832        0.18203        0.20029
C         -1.28283       -1.61894       -0.05832
C         -2.13761       -0.57406       -0.56964
H         -1.56988        1.25991        1.26086
H          2.25985       -1.81093        1.43174
H          1.76375       -2.66662       -0.48671
H          0.57541        3.14395        0.29944
P          1.87690       -1.41865        0.14182
H         -3.41999       -0.25439        1.15523
H          3.10788       -0.98159       -0.36872
H         -1.91603        1.91266       -0.42841
H          1.75024        2.36470       -1.32876
H         -0.98533       -2.37440       -0.78122
H         -3.97624        0.57030       -0.36924
H         -1.52707       -2.01343        0.92754
H         -2.13837       -0.40188       -1.64238
H          2.43145        2.12817        0.69154
P          1.26454        1.97738       -0.07111
Pt         0.09430       -0.04559        0.01401

18
Pt-4-endo-dig
C         -2.41470       -1.08967        0.50082
C         -1.74634       -0.72040       -0.65595
H          1.27424       -2.93337       -0.19586
H          2.05940       -1.83578        1.51869
H          2.88594       -1.48791       -0.46491
P          1.65084       -1.63733        0.18925
C         -2.83457        0.32279        0.85101
H         -3.92660        0.42007        0.76995
H         -2.56737        0.61268        1.87479
C         -2.05762        1.02942       -0.27337
H         -1.53106        1.97496       -0.08160
H         -2.65051        1.20326       -1.17747
H         -1.88208       -1.04442       -1.69010
P          1.63018        1.73417        0.17192
H          2.40482        2.04813       -0.95766
H          1.10542        2.99690        0.50048
H          2.63256        1.59900        1.14931
Pt         0.04691       -0.00566       -0.11581

20
Pt-4-endo-trig
C         -1.89951        0.72818        0.35705
C         -1.87923       -0.46185        1.20815
H          0.63678        3.04060        0.61254
H          2.52065        2.00773        0.31430
H          3.24519       -0.90332       -0.32158
P          1.17675        1.95514       -0.10038
H          1.28517        2.51946       -1.38429
H          2.00766       -2.44199       -1.16509
H         -1.99305        1.75220        0.71900
H         -1.27521       -0.49594        2.12417
H          2.28493       -2.32567        0.96291
P          1.97789       -1.48931       -0.12795
H         -2.77810       -1.06668        1.33197
C         -2.59665        0.10977       -0.84340
H         -3.68663        0.03538       -0.72563
H         -2.37531        0.57352       -1.80986
C         -1.86201       -1.22446       -0.62969
H         -1.08239       -1.45254       -1.37566
H         -2.41251       -2.14086       -0.42556
Pt         0.05121       -0.03951        0.04726

21
Pt-4-exo-dig
C         -3.31807        0.69387        0.43716
C         -1.88554        1.05256        0.04107
C         -3.40381       -0.61649       -0.32903
C         -0.96819       -1.70068        0.01179
C         -1.95913       -0.90293       -0.18059
H         -3.37913        0.51172        1.51517
H          2.81016       -1.30798        1.39295
H          2.07460       -2.65879       -0.14190
H          0.60807        3.02881       -0.86156
P          2.17895       -1.28621        0.13757
H         -4.05450       -1.40689        0.05985
H          3.24606       -0.91029       -0.69661
H         -4.04501        1.46876        0.16988
H          2.58475        2.15336       -0.76186
H         -1.39880        1.69796        0.77927
H         -3.64932       -0.44587       -1.38581
H         -1.83962        1.49278       -0.96009
H          1.57665        2.76217        1.04544
P          1.32510        2.05062       -0.14303
H         -0.80977       -2.77017        0.06119
Pt         0.25148       -0.07644        0.00856

23
Pt-4-exo-trig
C         -3.36492        0.82924        0.11710
C         -1.86295        1.08017       -0.08115
C         -3.20709       -0.64198        0.44636
C         -0.93600       -1.74132       -0.20862
C         -2.01013       -0.79738       -0.46364
H         -3.83156        1.47302        0.86926
H          2.89012       -1.23792        1.30961
H          1.96372       -2.71614        0.01395
H          2.22222        2.43736       -0.98405
P          2.14177       -1.32587        0.12277
H         -2.90027       -0.78262        1.49167
H          3.14044       -1.10071       -0.84036
H         -3.89541        0.95997       -0.83336
H          2.17910        2.40161        1.16467
H         -0.59735       -2.34234       -1.05570
H         -1.44779        1.41949        0.87896
H         -4.03810       -1.32288        0.22842
H         -1.59897        1.76027       -0.89521
H         -1.00514       -2.30552        0.72644
H         -2.26396       -0.67152       -1.51997
H          0.50655        3.21066        0.07138
P          1.35574        2.08318        0.06782
Pt         0.26247       -0.05616       -0.01596

21
Pt-5-endo-dig
C         -2.01862       -1.37908        0.17097
C         -1.44083       -0.81218       -0.91637
C         -2.81590       -0.44502        0.99173
C         -2.45328        1.01938        0.62747
C         -1.71654        1.00123       -0.69785
H         -3.85491       -0.67564        0.69224
H         -2.77715       -0.65522        2.06615
H         -1.81083        1.44210        1.40919
H         -3.35050        1.64723        0.57659
H         -1.13016        1.91127       -0.90390
H         -2.37070        0.93703       -1.57768
H         -1.46085       -1.14869       -1.95230
P          1.81780        1.73724        0.20156
H          2.78503        1.56748        1.20937
H          1.22964        2.95024        0.60605
H          2.62670        2.18031       -0.85956
P          1.78868       -1.68988        0.29782
H          2.74076       -1.45654        1.30700
H          2.60219       -2.18945       -0.73359
H          1.16159       -2.85935        0.76215
Pt         0.30548       -0.01949       -0.26460

23
Pt-5-endo-trig
C         -1.63269        0.99850        0.48033
C         -1.66539       -0.13576        1.37600
H          0.94215        3.12444        0.28340
H          2.77861        1.98627        0.16812
H          1.67420       -2.91221       -0.46922
P          1.44267        1.93124       -0.27072
H          1.60722        2.32884       -1.61048
H          2.77326       -1.84766        1.04341
H         -1.48511        2.00132        0.88177
H         -1.04828       -0.11051        2.27940
H          3.04933       -1.35930       -1.02774
P          2.00652       -1.59014       -0.10927
H         -2.58341       -0.69326        1.55794
C         -2.55254        0.78907       -0.70209
H         -3.51801        1.29248       -0.55334
H         -2.11327        1.21711       -1.61183
C         -2.74112       -0.73781       -0.82976
H         -2.84328       -1.03873       -1.87808
H         -3.66466       -1.03937       -0.32076
C         -1.55287       -1.44983       -0.18694
H         -0.81553       -1.73501       -0.95647
H         -1.76355       -2.34233        0.40314
Pt         0.20832        0.00777        0.08127

24
Pt-5-exo-dig-SP-onM062X
C         -3.87348        0.14372        0.17324
C         -2.85513        0.99690        0.92765
C         -3.08305       -0.96599       -0.54207
C         -1.56604        1.12853        0.12510
C         -0.72181       -1.70052        0.43784
C         -1.69291       -1.01590       -0.02857
H         -4.61518       -0.27757        0.85522
H          3.34507       -1.05861       -0.71775
H          3.08872       -0.90203        1.42058
H          2.06698        1.73905       -2.09342
P          2.35690       -1.20323        0.26511
Pt         0.41671       -0.07428       -0.00692
H         -3.51012       -1.96025       -0.38328
H          2.26767       -2.59782        0.35356
H         -4.40773        0.75011       -0.56271
H          2.47960        2.44858       -0.10690
H         -2.63282        0.56098        1.90772
H         -3.04373       -0.79608       -1.62246
H         -1.74530        1.48870       -0.89042
H         -0.92340        1.82563        0.66890
H         -3.24483        2.00543        1.10699
H          0.61062        2.96075       -1.05592
P          1.44611        1.85067       -0.84194
H         -0.49282       -2.70931        0.74365

26
Pt-5-exo-trig
C         -3.55952        0.22257        0.56348
C         -2.57955        1.33753        0.23116
C         -2.73450       -1.04967        0.66922
C         -1.68991        0.84899       -0.88707
C         -0.57444       -1.91459       -0.35158
C         -1.80587       -1.17843       -0.50777
H         -4.12380        0.41575        1.48211
H          3.09920       -0.62228        1.47852
H          2.19860       -2.49074        0.83742
H          2.22225        2.66020       -0.65724
P          2.32504       -1.15068        0.42931
H         -2.13854       -1.04493        1.59391
H          3.29812       -1.27107       -0.57858
H         -4.29052        0.12315       -0.25294
H          1.92341        2.37545        1.45034
H         -0.22198       -2.47671       -1.21903
H         -1.98108        1.59542        1.11777
H         -3.37111       -1.94491        0.69534
H         -2.24985        0.62434       -1.79582
H         -0.96183        1.59362       -1.22503
H         -3.10616        2.25103       -0.07861
H         -0.46488       -2.45642        0.59311
H         -2.29675       -1.31330       -1.47061
H          0.34349        3.21120        0.23747
P          1.26101        2.13793        0.23028
Pt         0.38963       -0.07526       -0.15061

24
Pt-6-endo-dig
C          1.10299       -1.24822        1.17926
C          1.35217       -0.20366       -1.09692
C          0.79630       -1.39586       -1.05742
H         -1.96326        2.95864       -0.37850
H         -1.33190        2.53817        1.62340
H         -2.71913       -2.09154        1.03723
P         -0.95809        2.23820        0.29760
H          0.10218        3.15723        0.15664
H         -3.48744       -1.40044       -0.83706
H          0.49662       -0.66923        1.87959
H         -3.64899       -0.17115        0.90627
P         -2.68310       -0.94008        0.22429
H          0.82432       -2.29968        1.16163
C          2.63809        0.47493       -0.93051
H          3.43594       -0.07347       -1.44874
H          2.62460        1.50950       -1.28925
C          2.90069        0.45108        0.60105
H          2.28594        1.22130        1.08688
H          3.95018        0.70189        0.78734
C          2.56222       -0.91946        1.16595
H          2.87319       -0.96137        2.22338
H          3.12479       -1.69613        0.63229
H          0.93851       -2.44100       -1.30310
Pt        -0.52301       -0.03541       -0.31814

26
Pt-6-endo-trig
C         -1.31612       -1.65996        0.05575
C         -1.40472        1.02504        0.81376
C         -1.45439       -0.20558        1.55919
H          1.35514        2.95008        0.66452
H          2.86442        1.92353       -0.50237
H          1.86629       -2.82322       -0.80922
P          1.47125        1.93174       -0.30014
H          1.05262        2.62807       -1.44892
H          2.92428       -1.91667        0.83479
H         -1.05962        1.90682        1.35841
H         -0.62333       -1.98925       -0.73178
H         -0.81091       -0.30274        2.43647
H          3.17938       -1.15272       -1.15392
P          2.14687       -1.54641       -0.27939
H         -1.37700       -2.46996        0.78482
H         -2.39331       -0.73656        1.69409
C         -2.48294        1.25239       -0.21892
H         -3.44530        1.37047        0.30729
H         -2.29835        2.19823       -0.74400
C         -2.60645        0.11601       -1.23893
H         -1.76528        0.16950       -1.94794
H         -3.51855        0.26403       -1.82998
C         -2.63165       -1.27540       -0.60790
H         -2.83927       -2.02080       -1.38852
H         -3.46671       -1.34149        0.10535
Pt         0.32261       -0.02973        0.13466

27
Pt-6-exo-dig
C          3.52740        0.37239       -0.43490
C          3.34931       -0.64014        0.68396
C          2.35700        0.26875       -1.42866
C          2.14261       -0.28665        1.56195
C          0.32294       -1.37820       -1.01318
C          1.14743       -0.40291       -0.89924
H          3.58487        1.38572       -0.01582
H         -2.74159       -2.19411       -1.61666
H         -3.40516       -2.12752        0.44264
P         -2.85554       -1.29122       -0.54507
H          2.07736        1.25181       -1.82851
H         -3.99731       -0.56671       -0.93322
H          4.46855        0.20792       -0.97057
H          4.25041       -0.68855        1.30632
H          2.64513       -0.34881       -2.29093
H          1.67911       -1.19595        1.96678
H          2.49674        0.28357        2.43601
H          3.22587       -1.64007        0.24493
H          0.17449       -2.29216       -1.57091
C          1.04631        0.58956        0.95880
H          0.36722        0.80243        1.79548
H          1.38095        1.55488        0.56898
P         -2.09239        1.72350        0.96209
H         -1.29986        2.78596        1.44265
H         -2.96185        2.41979        0.10170
H         -2.94672        1.53990        2.06604
Pt        -0.91791       -0.12695        0.02531

29
Pt-6-exo-trig
C         -3.80856       -0.76877        0.54593
C         -3.80723        0.73868        0.36809
C         -2.40774       -1.33606        0.70019
C         -2.89917        1.18517       -0.76727
C         -0.28059       -1.85375       -0.55179
C         -1.50039       -1.10319       -0.48894
H         -4.41210       -1.05139        1.41768
H          2.66676       -2.48453       -0.24064
H          3.76695       -0.62248       -0.42482
P          2.62793       -1.15242        0.20865
H         -1.92771       -0.95036        1.61139
H          3.10785       -1.30149        1.52219
H         -4.28677       -1.23806       -0.32795
H          0.06235       -2.17684       -1.53723
H         -3.47563        1.22394        1.30031
H         -2.46793       -2.42626        0.83328
H         -3.16946        0.66935       -1.70055
H         -3.07315        2.25398       -0.96407
H         -4.82916        1.09259        0.18114
H         -0.11556       -2.58946        0.24053
H         -1.98585       -0.94517       -1.45098
C         -1.40476        1.08784       -0.46909
H         -0.86810        1.59596       -1.27980
H         -1.24897        1.60670        0.48540
P          1.55070        2.11017        0.44017
H          2.72755        2.51465       -0.21953
H          0.71146        3.21041        0.15813
H          1.91403        2.40810        1.76764
Pt         0.63456       -0.04546       -0.06788

27
Pt-7-endo-dig-SP-onM062X
C          1.90355       -1.01776        1.51671
C          1.28269        0.00196       -1.22062
C          0.90811       -1.24925       -1.26228
H         -0.42250        3.14380       -0.30841
H         -0.07908        2.43128        1.68440
H          1.44583       -0.19408        2.07447
H         -2.07882        2.52195        0.90946
P         -0.79999        2.08548        0.53157
H          2.21380       -1.75900        2.26860
C          2.46782        0.87503       -1.28862
H          3.18853        0.45789       -2.00022
H          2.21510        1.89287       -1.59518
C          3.06989        0.87687        0.13664
H          2.47343        1.53812        0.77694
H          4.06809        1.31943        0.06827
C          3.17185       -0.50963        0.80120
H          3.95342       -0.44587        1.56428
H          3.51712       -1.25326        0.07077
H          1.05062       -2.18411       -1.77985
C          0.83986       -1.75217        0.71890
H          1.20329       -2.67994        0.28316
H         -0.04473       -1.98437        1.31354
P         -2.61869       -0.92560        0.32431
H         -3.45662       -0.18980        1.17685
H         -3.50295       -1.12691       -0.74605
H         -2.71240       -2.18297        0.94558
Pt        -0.46964       -0.07950       -0.24196

29
Pt-7-endo-trig
C         -1.86951       -1.80240       -0.63935
C         -1.14964        1.21801        0.94767
C         -1.42400        0.02642        1.69275
H          0.85505        2.56875       -1.54679
H          1.67797        2.92637        0.42249
P          1.51777        1.88502       -0.50995
H          2.81762        1.80343       -1.04298
H         -0.68166        2.02681        1.51621
H         -1.17958       -1.78340       -1.49746
H         -0.93368       -0.12031        2.65433
H         -2.35538       -2.79087       -0.67187
H         -2.44480       -0.34145        1.67219
C         -2.17049        1.65187       -0.08303
H         -3.11572        1.86384        0.44547
H         -1.85438        2.60933       -0.51987
C         -2.45356        0.67686       -1.23082
H         -1.55699        0.59398       -1.86696
H         -3.21743        1.15334       -1.86024
C         -2.94589       -0.73788       -0.88269
H         -3.53452       -1.09526       -1.73794
H         -3.66025       -0.70060       -0.04574
C         -1.06252       -1.76134        0.65164
H         -1.62404       -2.12442        1.51221
H         -0.20419       -2.43729        0.61522
P          2.15613       -1.53571       -0.40801
H          1.78383       -2.86482       -0.70473
H          2.93100       -1.24090       -1.54699
H          3.19008       -1.77616        0.51779
Pt         0.43579       -0.00651        0.23659
